# Supplementary material for: Development of a Cytocompatible Scaffold from Pig Immature Testicular Tissue Allowing Human Sertoli Cell Attachment, Proliferation and Functionality
Source: PubMed Central journal article supplement (PMC5796176; doi:10.3390/ijms19010227), 2018-01-12
Supplement: ijms-19-00227-s001.pdf [file ijms-19-00227-s001.pdf]

**CERTIFICATE OF ANALYSIS**

**Product Code:** MM-HSE-2305  
**Product:** Human Sertoli Cells

**Lot Number:** 230501081  
**Manufacture Date:** 02-Jan-2008

**TEST (Method)**

**SPECIFICATIONS**

|                               | Min.       | Max.     | Results         |
|-------------------------------|------------|----------|-----------------|
| Donor Screen Information:     |            |          |                 |
| Age                           | ***        | ***      | 23 Y            |
| Sex                           | ***        | ***      | MALE            |
| Race                          | ***        | ***      | C               |
| Cell Type                     | ***        | ***      | PRIMARY SERTOLI |
| Date of Cryopreservation      | ***        | ***      | 02 JAN 2008     |
| Cell Passage Frozen           |            |          | 3               |
| Viability-Tryp.Blue Exclusion | >= 70%     | ***      | 91,00 %         |
| Cell Count (cells/amp)        | >= 500,000 | ***      | 538000          |
| Total Population Doublings    | >= 8       | ***      | 11              |
| Seeding Efficiency            | >=50%      | ***      | 83 %            |
| Doubling Time (days)          | 2.0        | 5.0      | 3,5 Days        |
| SOX9 (FACS)                   | 70         | 100      | 97 %            |
| GATA4 (FACS)                  | 70         | 100      | 98 %            |
| Sterility                     | Negative   | Negative | Negative        |
| Direct Plating (Mycoplasma)   | ***        | ***      | Negative        |
| Hoechst Stain Procedure       | ***        | ***      | Negative        |
| Virus Testing:                |            |          |                 |
| HSV Test                      | ***        | ***      | Not detected    |
| HBV Test                      | ***        | ***      | Not detected    |
| HCV Test                      | ***        | ***      | Not detected    |

Details concerning the use of our cell and media products can be downloaded from our website at [www.lonza.com/cell-protocols](http://www.lonza.com/cell-protocols).

This lot has been reviewed by Quality Assurance in compliance with requirements of Lonza's Quality System.  
 This document was generated from a validated Part 11-compliant electronic system and thus handwritten signatures are not required.
